# Supplementary material
Source: publisher figshare collection journal article supplement (https://rs.figshare.com/ndownloader/files/18083588)
Supplement: Supplementary file [file 18083588]

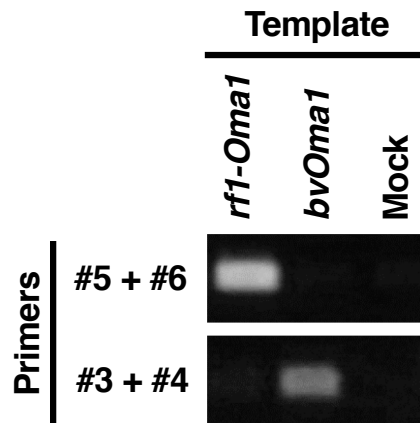

**Fig. S1. Specificity of qRT-PCR primers.**

Plasmid DNAs containing either *rf1-Oma1* (the binary vector used in [16]) or *bvOma1* (this study) were subjected to PCR using primers #5 and #6 or #3 and #4 with Blend Taq (Toyobo, Osaka, Japan). The PCR program was 30 cycles of 95°C for 30 sec, 60.8°C (the same temperature as used in the qRT-PCR assay) for 30 sec and 72°C for 30 sec. The PCR products were electrophoresed in 2% agarose gels. The Mock sample contained all the components except the template DNA.
